# Supplementary material for: Structures and properties of ferrocene derivatives with different kinds of nitroxide radicals
Source: Royal Society of Chemistry journal article supplement (doi:10.1039/c3nj00343d), 2013-01-01
Supplement: c3nj00343d.pdf [file c3nj00343d.pdf]

## Supporting Information

### SI-1. Summary of Crystal Data for **1** - **3**<sup>a</sup>

|                                              | <b>1</b>                                           | <b>2</b>                                           | <b>3</b>                                           |
|----------------------------------------------|----------------------------------------------------|----------------------------------------------------|----------------------------------------------------|
| Formula                                      | C <sub>21</sub> H <sub>28</sub> NO <sub>3</sub> Fe | C <sub>20</sub> H <sub>26</sub> NO <sub>3</sub> Fe | C <sub>20</sub> H <sub>24</sub> NO <sub>3</sub> Fe |
| Formula weight                               | 398.30                                             | 384.28                                             | 382.26                                             |
| Crystal system                               | monoclinic                                         | monoclinic                                         | monoclinic                                         |
| Space group                                  | P2 <sub>1</sub> /c                                 | P2 <sub>1</sub> /n                                 | P2 <sub>1</sub> /c                                 |
| a/Å                                          | 6.0132(13)                                         | 10.7610(7)                                         | 21.162(6)                                          |
| b/Å                                          | 14.588(4)                                          | 11.9388(15)                                        | 8.427(3)                                           |
| c/Å                                          | 22.279(5)                                          | 15.1774(3)                                         | 10.717(3)                                          |
| α/degrees                                    | 90                                                 | 90                                                 | 90                                                 |
| β/degrees                                    | 95.358(5)                                          | 105.6595(5)                                        | 91.718(7)                                          |
| γ/degrees                                    | 90                                                 | 90                                                 | 90                                                 |
| V/Å <sup>3</sup>                             | 1945.7(8)                                          | 1877.5(3)                                          | 1910.4(9)                                          |
| Z                                            | 4                                                  | 4                                                  | 4                                                  |
| D (calc)/gcm <sup>-3</sup>                   | 1.360                                              | 1.359                                              | 1.329                                              |
| No. of total processed reflections           | 14855                                              | 15079                                              | 8163                                               |
| No. of unique reflections in refinement F>2σ | 4336                                               | 4162                                               | 4213                                               |
| R <sub>1</sub>                               | 0.0636                                             | 0.0639                                             | 0.0548                                             |
| R <sub>w</sub>                               | 0.0976                                             | 0.1715                                             | 0.1857                                             |

<sup>a</sup>X-ray data were collected with Mo Kα radiation at room temperature.

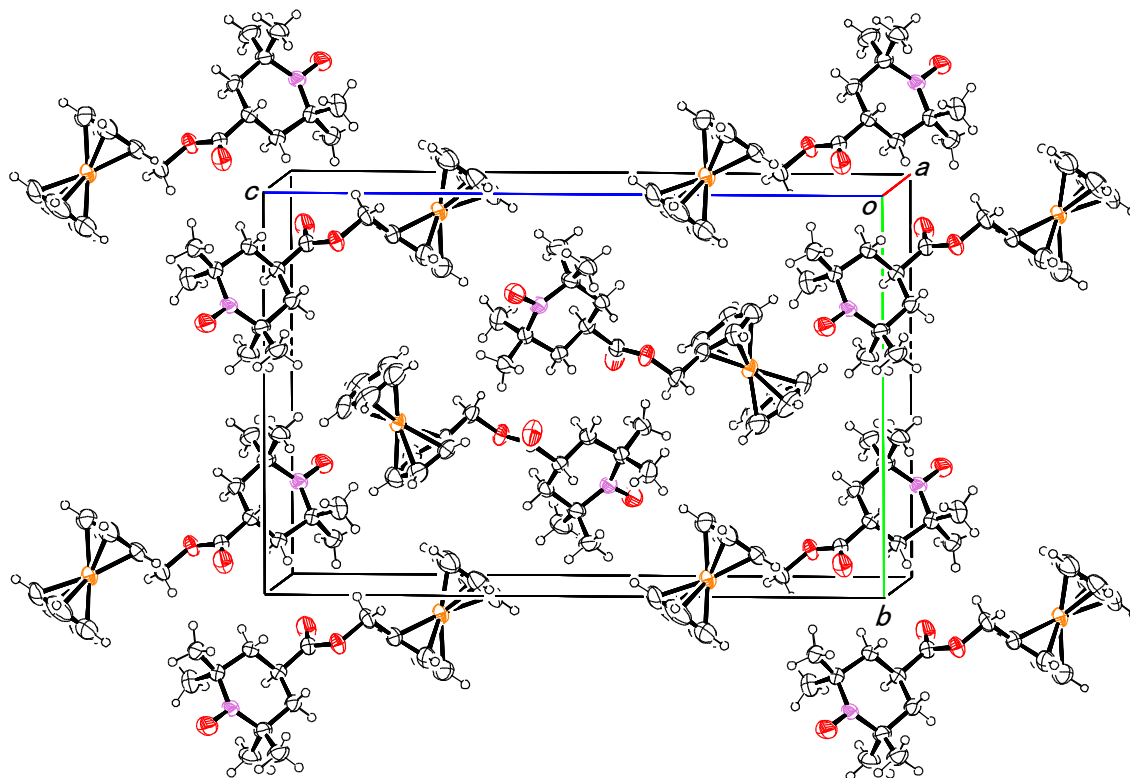

SI-2. Packing feature of **1** viewed almost along the a-axis.

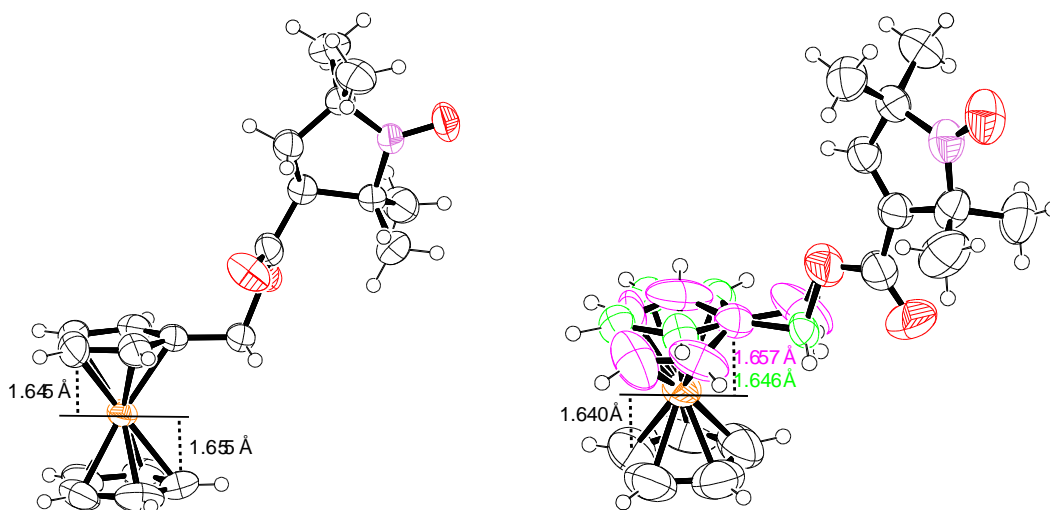

SI-3. Molecular structures of **2** (left) and **3** (right) obtained by the X-ray analysis.

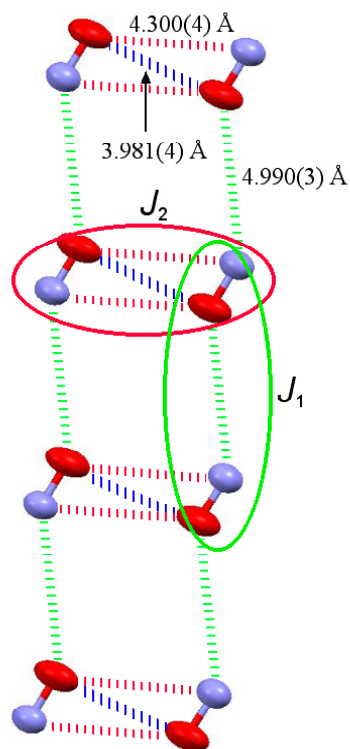

**SI-4.** Schematic drawing of spin-spin interactions between spin centres in **3**, where  $J_1$  denotes the magnitude of inter-dimer interactions and  $J_2$  denotes those of intra-dimer ones respectively.

**SI-5.** Summary of ESR data for **1 - 3**

| Compound                          | $g$    | $a_N / G$ |
|-----------------------------------|--------|-----------|
| <b>1</b> (solid)                  | 2.0080 | –         |
| <b>1</b> (solution <sup>a</sup> ) | 2.0066 | 15.67     |
| <b>2</b> (solid)                  | 2.0081 | –         |
| <b>2</b> (solution <sup>a</sup> ) | 2.0065 | 14.32     |
| <b>3</b> (solid)                  | 2.0077 | –         |
| <b>3</b> (solution <sup>a</sup> ) | 2.0064 | 14.61     |

<sup>a</sup>Solvent: benzene.

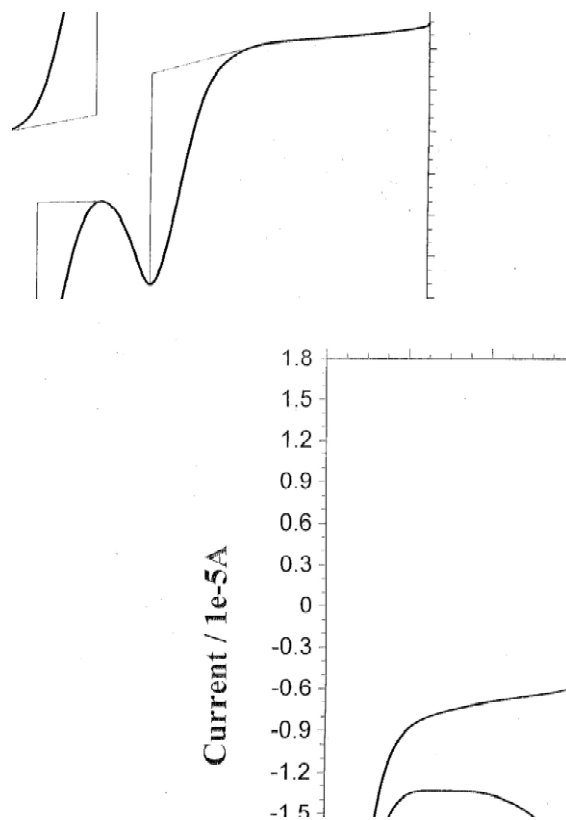

**SI-6.** CV plots for **2** as a representative.
